# Marine Macroalgal Diversity Assessment of Saba Bank, Netherlands Antilles

Mark M. Littler\*, Diane S. Littler, Barrett L. Brooks

Department of Botany, Smithsonian Institution, Washington, D. C., United States of America

## Abstract

**Background:** Located in the Dutch Windward Islands, Saba Bank is a flat-topped seamount (20–45 m deep in the shallower regions). The primary goals of the survey were to improve knowledge of biodiversity for one of the world's most significant, but little-known, seamounts and to increase basic data and analyses to promote the development of an improved management plan.

**Methodology/Principal Findings:** Our team of three divers used scuba to collect algal samples to depths of 50 m at 17 dive sites. Over 360 macrophyte specimens (12 putative new species) were collected, more than 1,000 photographs were taken in truly exceptional habitats, and three astonishing new seaweed community types were discovered. These included: (1) "Field of Greens" (N 17°30.620', W 63°27.707') dominated by green seaweeds as well as some filamentous reds, (2) "Brown Town" (N 17°28.027', W 63°14.944') dominated by large brown algae, and (3) "Seaweed City" (N 17°26.485', W 63°16.850') with a diversity of spectacular fleshy red algae.

**Conclusions/Significance:** Dives to 30 m in the more two-dimensional interior habitats revealed particularly robust specimens of algae typical of shallower seagrass beds, but here in the total absence of any seagrasses (seagrasses generally do not grow below 20 m). Our preliminary estimate of the number of total seaweed species on Saba Bank ranges from a minimum of 150 to 200. Few filamentous and thin sheet forms indicative of stressed or physically disturbed environments were observed. A more precise number still awaits further microscopic and molecular examinations in the laboratory. The expedition, while intensive, has only scratched the surface of this unique submerged seamount/atoll.

**Citation:** Littler MM, Littler DS, Brooks BL (2010) Marine Macroalgal Diversity Assessment of Saba Bank, Netherlands Antilles. PLoS ONE 5(5): e10677. doi:10.1371/journal.pone.0010677

**Editor:** Stuart A. Sandin, University of California San Diego, United States of America

**Received:** May 6, 2009; **Accepted:** January 24, 2010; **Published:** May 21, 2010

This is an open-access article distributed under the terms of the Creative Commons Public Domain declaration which stipulates that, once placed in the public domain, this work may be freely reproduced, distributed, transmitted, modified, built upon, or otherwise used by anyone for any lawful purpose.

**Funding:** Financial support for this study came from the Department of Environment and Nature of the Netherlands Antilles, Conservation International and the Smithsonian Marine Station at Ft. Pierce (SMSFP Contribution No. 810). The funding sources provided critical assistance in determining dive site locations but had no role in study design, data collection and analysis, decision to publish, or preparation of the manuscript.

**Competing Interests:** The authors have declared that no competing interests exist.

\* E-mail: littlerm@si.edu

## Introduction

Located in the Dutch Windward Islands about 250 km SE of Puerto Rico, Saba Bank is a flat-topped seamount rising 1.8 km from the surrounding sea floor (Figure 1). The dimensions of the Bank are extremely large for an atoll/seamount; the platform above the 200 m isobath is 65 km in length by 40 km in breadth, and it covers an area of 2,200 km<sup>2</sup>. A large portion of the Bank (about 225 km<sup>2</sup> in area) lies between 12 and 20 m in depth and contains a rich assemblage of biota in varied habitats; most of the remainder of the summit is between 20 and 50 m in depth and remains virtually unexplored. Saba Bank meets the true definition of a seamount being isolated by deep water; in this case the nearest islands are Saba and St. Eustatius. Except for the fact that it does not break the water surface, Saba Bank is a classic atoll consisting of a submerged mountain crowned at the summit with a ring of actively growing coral reefs. Saba Bank is the largest atoll in the Atlantic Ocean Basin and one of the three largest atolls on earth [1].

Because of its distance from large land masses, Saba Bank is relatively free of the problems that are degrading many Caribbean reef systems, mainly sedimentary run off from poor farming practices or rapid construction, increased nutrient loading from an

ever-increasing human population, and overfishing by local fisherman. There is little room for agriculture on Saba Island's five square miles; the ~1,500 residents rely mainly on income from tourists that come to scuba dive. The fishing community also generates a significant income from fishing nearby Saba Bank.

However, Saba Bank is threatened by the oil trans-shipment depot on nearby St. Eustatius Island. Supertankers stop there to transfer oil to tanks used to fill smaller ships that are able to enter countries without deep-water ports. Rather than pay mooring fees at St. Eustatius, tankers drop anchor on Saba Bank at no monetary cost (but often with detrimental biological damage). The immediate concerns for the Bank includes anchor damage, prop blast, and abrasion by large oil tankers maneuvering off the petroleum trans-shipment facilities on St. Eustatius, petroleum spillage and subsequent use of dispersants, possible overfishing for certain species, and exploration for petroleum reserves (so far unsuccessful). At the same time, the Bank's fisheries and dive operations are economically significant to the small community on Saba Island (about 1,500 residents) that has direct responsibility for its management.

Although it ranks among the major topographic structures of the Caribbean, Saba Bank is one of the most poorly known. A

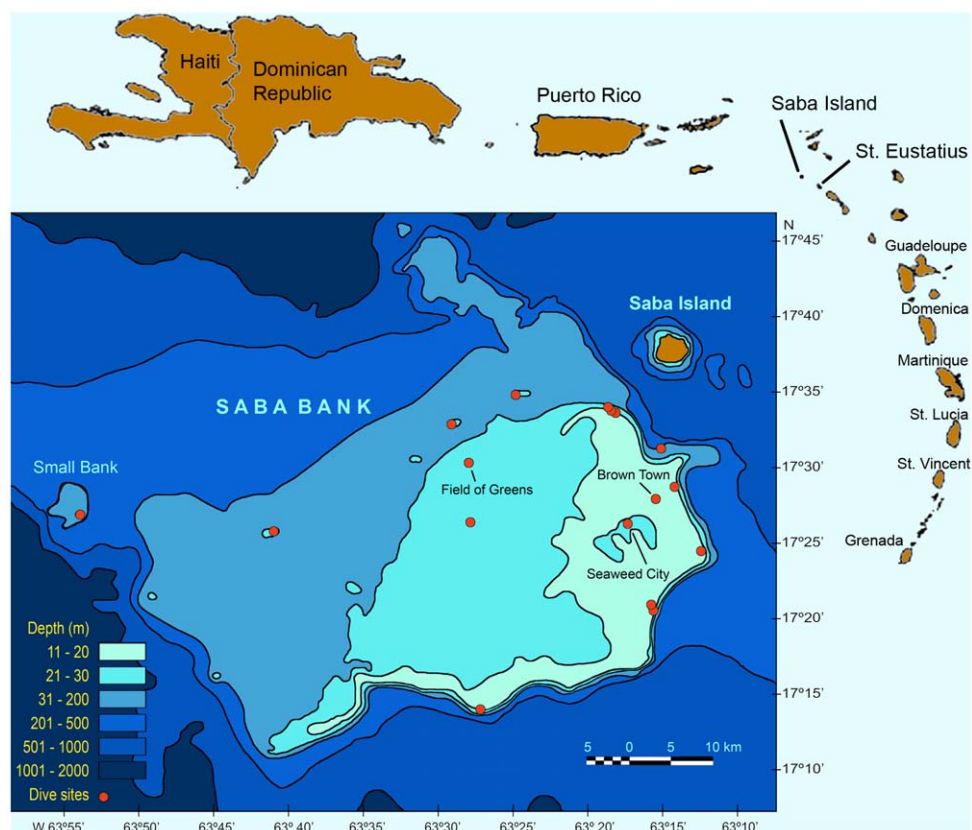

**Figure 1. Saba Bank.** Bathymetric chart of Saba Bank in relation to Caribbean islands, showing the 17 collecting locations with the unique algal sites labeled as Field of Greens, Brown Town and Seaweed City.  
doi:10.1371/journal.pone.0010677.g001

series of interpretations of its structure and origin [2-4] has culminated in the view that the Bank essentially duplicates the atolls of the Pacific [5]. Small samples of fishes and possibly other organisms have been collected by passing research vessels (the R/V Oregon in 1968 and 1969 and the R/V Pillsbury in 1969), and Macintyre and others carried out a preliminary survey in 1970 [6]. A Dutch expedition in 1974 utilized echo soundings, bottom sampling, and scuba to characterize the reef communities [5]. The hydrographic research vessel HNMNS Tydeman carried out a survey of the seafloor in 1996, which resulted in the current nautical charts. More recently in a post-hurricane rapid assessment, three sites on Saba Bank's eastern edge showed [7] average macroalgal biomass to be inversely related to that of herbivorous fishes, with turf algae and crustose coralline algae relatively more abundant (8 and 11 times more, respectively).

Saba Bank was the focus of a joint program initiated by the Department of Environment and Nature of the Netherlands Antilles, Conservation International, and the Protocol for Specially Protected Areas and Wildlife (SPA) of the Convention for the protection and development of the marine environment in the Wider Caribbean (Cartagena Convention), of the Caribbean Regional Seas Program under the United Nations Environmental Program (UNEP). The primary goals of the survey were to: improve knowledge of biodiversity for one of the world's most significant coral/algal-capped seamounts; increase basic information in support of improved management; provide data and analyses to support the development of a marine zoning plan; and contribute to a petition to the International Maritime Organiza-

tion to designate appropriate parts of Saba Bank as Particularly Sensitive Areas.

Much of the paucity of data stems from difficulties in logistics and hazardous sea conditions characteristic of Saba Banks. On some days, the small marine park patrol boats and fishing boat struggled more than 56 km to designated preselected dive sites in 4-m seas.

## Results

Three hundred sixty specimens of macrophytes were collected by our team. Many of these include numerous other archived but uncounted species of epiphytes and smaller microscopic taxa. Our preliminary estimate of the number of macrophyte species collected from Saba Bank ranges upward from 150 to 200. A more precise number awaits long hours of microscopic and molecular examinations in the laboratory. However, the present annotated checklist of 98 taxa (Table 1) includes 43 Rhodophyta, 26 Chlorophyta, 26 Phaeophyceae, and 3 Cyanophyta (Cyanobacteria). The species accrual curve for these collections (Figure 2) [8] was steadily inclined after the 17 dive sites (Table 2), and showed no clear asymptote, indicating Saba Bank has many more species to be collected. It is important to note that there were few filamentous and thin sheet forms indicative of stressed or physically disturbed environments observed [9,10].

Three sites surveyed were dominated by previously unknown unique algal communities. These included: (1) "Field of Greens"

**Table 1.** Annotated list of algae identified from Saba Bank arranged by major groups.

| <b>Bluegreens (Cyanobacteria)</b>                                         |                     |
|---------------------------------------------------------------------------|---------------------|
| <b>Species name</b>                                                       | <b>Collection #</b> |
| <i>Lyngbya polychroa</i> (Meneghini) Rabenhorst                           | D&ML 67418          |
| <i>Phormidium</i> cf. <i>dimorphum</i> Lemmerman                          | D&ML 67417          |
| <i>Symploca hydroides</i> (Harvey) Kützing                                | D&ML 67420          |
| <b>Browns (Phaeophyceae)</b>                                              |                     |
| <b>Species name</b>                                                       | <b>Collection #</b> |
| <i>Dictyopteris justii</i> JV Lamouroux                                   | D&ML 67488          |
| <i>Dictyota</i> cf. <i>ciliolata</i> Sonder ex Kützing                    | D&ML 67439          |
| <i>Dictyota ciliolata</i> Sonder ex Kützing                               | D&ML 67451          |
| <i>Dictyota crispata</i> JV Lamouroux                                     | D&ML 67500          |
| <i>Dictyota guineensis</i> (Kützing) P & H Crouan                         | D&ML 67491          |
| <i>Dictyota hamifera</i> Setchell                                         | D&ML 67419          |
| <i>Dictyota humifusa</i> Hörnig, Schnetter & Coppejans                    | D&ML 67250          |
| <i>Dictyota menstrualis</i> (Hoyt) Schnetter, Hörnig & Weber-Peukert      | D&ML 67475          |
| <i>Dictyota mertensii</i> (Martius) Kützing                               | D&ML 67452          |
| <i>Dictyota pinnatifida</i> Kützing                                       | D&ML 67300          |
| <i>Lobophora variegata</i> (JV Lamouroux) Womersley ex Oliveira           | D&ML 67241          |
| <i>Sargassum hystrix</i> J Agardh                                         | D&ML 67296          |
| <i>Sargassum platycarpum</i> Montagne                                     | D&ML 67411          |
| <i>Sargassum polyceratum</i> ? Montagne                                   | D&ML 67454          |
| <i>Styopodium zonale</i> (JV Lamour.) Papenfuss                           | D&ML 67414          |
| <i>Zonaria tournefortii</i> (JV Lamour.) Montagne                         | D&ML 67350          |
| <b>Greens (Chlorophyta)</b>                                               |                     |
| <b>Species name</b>                                                       | <b>Collection #</b> |
| <i>Avrainvillea asarifolia</i> Børgesen                                   | D&ML 67302          |
| <i>Caulerpa cupressoides</i> (Vahl) C Agardh                              | D&ML 67569          |
| <i>Caulerpa mexicana</i> Sonder ex Kützing                                | D&ML 67530          |
| <i>Caulerpa microphysa</i> (Weber-van Bosse) J Feldmann                   | D&ML 67499          |
| <i>Caulerpa prolifera</i> (Forsskål) JV Lamour                            | D&ML 67576          |
| <i>Caulerpa racemosa</i> f. <i>lamourouxii</i> (Turner) Weber-van Bosse   | D&ML 67504          |
| <i>Caulerpa serrulata</i> (Forsskål) J Agardh                             | D&ML 67379          |
| <i>Caulerpa webbiana</i> Montagne                                         | D&ML 67387          |
| <i>Codium taylorii</i> PC Silva                                           | D&ML 67490          |
| <i>Dictyosphaeria cavernosa</i> (Forsskål) Børgesen                       | D&ML 67492          |
| <i>Halimeda</i> cf. <i>tuna</i> f. <i>platydisca</i> (Decaisne) ES Barton | D&ML 67274          |
| <i>Halimeda discoidea</i> Decaisne                                        | D&ML 67460          |
| <i>Halimeda goreau</i> WR Taylor                                          | D&ML 67272          |
| <i>Neomeris annulata</i> Dickie                                           | D&ML 67507a         |
| <i>Neomeris mucosa</i> MA Howe                                            | D&ML 67507b         |
| <i>Penicillus capitatus</i> Lamarck                                       | D&ML 67571          |
| <i>Penicillus dumetosus</i> (JV Lamour.) Blainville                       | D&ML 67529          |
| <i>Rhypocephalus phoenix</i> (J Ellis & Solander) Kützing                 | D&ML 67512          |
| <i>Udotea cyathiformis</i>                                                | D&ML 67359          |
| <i>Udotea dotyi</i> DS Littler & MM Littler                               | D&ML 67575          |
| <i>Udotea occidentalis</i> ? A Gepp & ES Gepp                             | D&ML 67573          |
| <i>Udotea spinulosa</i> MA Howe                                           | D&ML 67574          |
| <i>Valonia macrophysa</i> Kützing                                         | D&ML 67509          |

**Table 1.** Cont.

| <b>Reds (Rhodophyta)</b>                                            |                     |
|---------------------------------------------------------------------|---------------------|
| <b>Species name</b>                                                 | <b>Collection #</b> |
| <i>Amphiroa tribulus</i> (J Ellis & Solander) JV Lamouroux          | D&ML 67422          |
| <i>Asteromenia peltata</i> (WR Taylor) Huisman & A Millar           | D&ML 67428          |
| <i>Champia parvula</i> (C Agardh) Harvey                            | D&ML 67331          |
| <i>Champia salicornioides</i> Harvey                                | D&ML 67342          |
| <i>Chondria dasyphylla</i> (Woodward) C Agardh                      | D&ML 67503          |
| <i>Chondrophycus corallopsis</i> (Montagne) Nam                     | D&ML 67566          |
| <i>Chrysomenia dickieana</i> J Agardh                               | D&ML 67541          |
| <i>Chrysomenia enteromorpha</i> Harvey                              | D&ML 67338          |
| <i>Cryptonemia crenulata</i> (J Agardh) J Agardh                    | D&ML 67511          |
| <i>Dasya antillarum</i> (MA Howe) AJK Millar                        | D&ML 67548          |
| <i>Dasya baillouviana</i> (SG Gmelin) Montagne                      | D&ML 67567          |
| <i>Dasya collinsiana</i> MA Howe                                    | D&ML 67352          |
| <i>Dasya crouaniana</i> J Agardh                                    | no number           |
| <i>Dasya harveyi</i> Ashmead ex Harvey                              | D&ML 67542          |
| <i>Dasya mollis</i> Harvey                                          | D&ML 67553          |
| <i>Dasya punicea</i> (Zanardini) Meneghini ex Zanardini             | D&ML 67326          |
| <i>Dudresnaya bermudensis</i> Setchell                              | D&ML 67400          |
| <i>Eucheuma isiforme</i> (C Agardh) J Agardh                        | D&ML 67324          |
| <i>Galaxaura rugosa</i> (J Ellis & Solander) JV Lamouroux           | D&ML 67423          |
| <i>Gelidiopsis intricata</i> (C Agardh) Vickers                     | D&ML 67510          |
| <i>Gracilaria cervicornis</i> (Turner) J Agardh                     | D&ML 67514          |
| <i>Gracilaria cylindrica</i> Børgesen                               | D&ML 67317          |
| <i>Griffithsia schousboei</i> Montagne                              | D&ML 67534          |
| <i>Halymenia floresii</i> (Clemente y Rubio) C Agardh               | D&ML 67543          |
| <i>Hypoglossum hypoglossoides</i> (Stackhouse) Collins & Hervey     | D&ML 67535          |
| <i>Jania capillacea</i> Harvey                                      | D&ML 67501          |
| <i>Laurencia chondrioides</i> Børgesen                              | D&ML 67318          |
| <i>Laurencia intricata</i> JV Lamouroux                             | D&ML 67421          |
| <i>Laurencia lata</i> MA Howe & WR Taylor                           | D&ML 67539          |
| <i>Meristiella schrami</i> Ai (Crouan & Crouan) Cheney & Gabrielson | D&ML 67497          |
| <i>Neogoniolithon spectabile</i> (Foslie) Setchell & Mason          | D&ML 67405          |
| <i>Peyssonnelia conchicola</i> Piccone & Grunow                     | D&ML 67517          |
| <i>Porolithon pachydermum</i> (Foslie) Foslie                       | no number           |
| <i>Scinaia halliae</i> (Setchell) Huisman                           | D&ML 67537          |
| <i>Tricleocarpa fragilis</i> (Linnaeus) Huisman & Townsend          | D&ML 67489          |
| <i>Wrangelia penicillata</i> (C Agardh) C Agardh                    | D&ML 67288          |
| <i>Wrightiella blodgettii</i> (Harvey) F Schmitz                    | D&ML 67322          |

doi:10.1371/journal.pone.0010677.t001

(N 17°30.620', W 63°27.707') characterized by an abundance by green seaweeds (Chlorophyta, Figure 3) as well as some filamentous reds, (2) "Brown Town" (N 17°28.027', W 63°14.944') dominated by large brown algae (Phaeophyceae, Figure 4), and (3) "Seaweed City" (N 17°26.485', W 63°16.850') with a diversity of spectacular fleshy red algae (Rhodophyta, Figures 5 and 6). Possibly 12 new species of brown algae (Figure 7) may be named following further scientific investigation. All of these macroalgae and their collection locations can be viewed as a virtual herbarium [11], where users can search for any combination of phylum, family, genus, species, infra-specific rank,

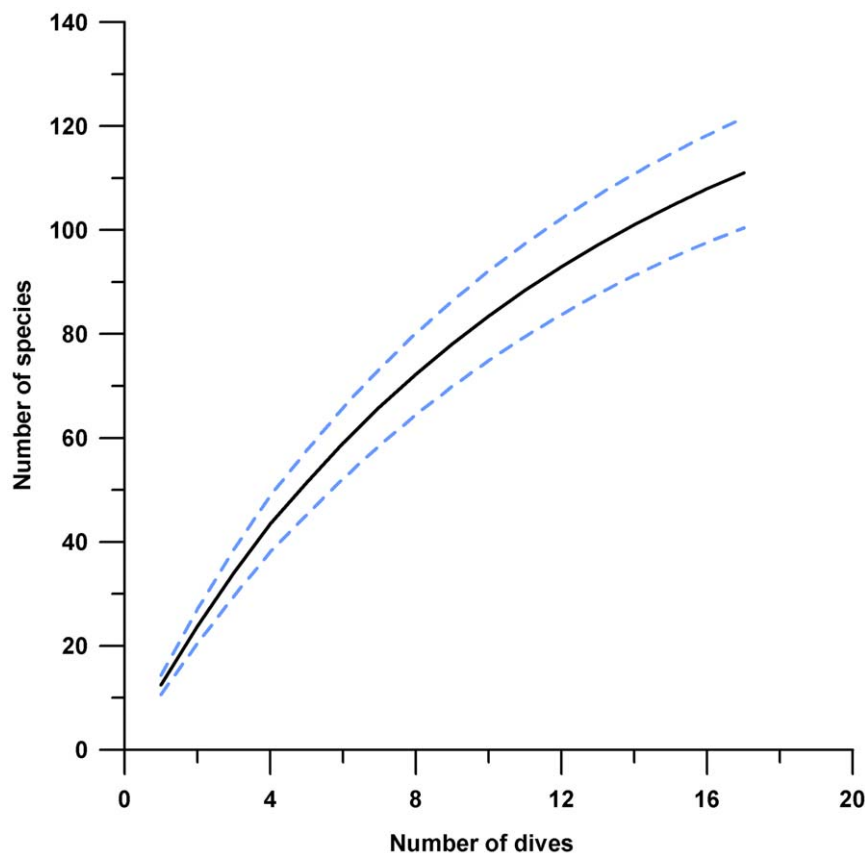

**Figure 2. Species accrual curve for algae on Saba Bank.** Several undetermined species (spp.) not included in the check list were used in this graph. Sample based rarefaction curve shown in black is based on 17 dive sites. The Mau Tao estimator [8] of expected richness with 95% confidence intervals shown in blue. The curve reaches no asymptote, indicating a likelihood that many additional algal species remain to be found.

doi:10.1371/journal.pone.0010677.g002

**Table 2.** Listing of site data.

| Site# | Date      | Site Name                        | Latitude    | Longitude   | Depth m |
|-------|-----------|----------------------------------|-------------|-------------|---------|
| 1     | 4-Jan-06  | Poison Bank (Northeast Reef)     | 17° 28.756N | 63° 13.600W | 20-27   |
| 2     | 5-Jan-06  | Small Bank South                 | 17° 26.827N | 63° 54.057W | 37-42   |
| 3     | 5-Jan-06  | Rhodolith Reef (middle area)     | 17° 25.832N | 63° 40.962W | 38      |
| 4     | 6-Jan-06  | Redman Bulge 3 (Overall Bank)    | 17° 24.599N | 63° 11.802W | 35      |
| 5     | 6-Jan-06  | Seaweed City                     | 17° 26.485N | 63° 16.850W | 24      |
| 6     | 7-Jan-06  | Grouper Bank                     | 17° 33.085N | 63° 28.847W | 36      |
| 7     | 7-Jan-06  | Rendezvous Hill                  | 17° 34.873N | 63° 24.450W | 23      |
| 8     | 8-Jan-06  | Butterfly Reef                   | 17° 14.083N | 63° 26.996W | 22-37   |
| 9     | 9-Jan-06  | Moonfish Bank (Fishpot Surprise) | 17° 33.774N | 63° 17.897W | 19      |
| 10    | 10-Jan-06 | Moonfish Bank (Lost Anchor)      | 17° 33.895N | 63° 17.965W | 25-28   |
| 11    | 10-Jan-06 | Moonfish Bank                    | 17° 33.900N | 63° 18.221W | 19      |
| 12    | 12-Jan-06 | Poison Bank                      | 17° 30.758N | 63° 13.692W | 29      |
| 13    | 12-Jan-06 | Brown Town                       | 17° 28.027N | 63° 14.944W | 20      |
| 14    | 13-Jan-06 | Red Flats                        | 17° 26.359N | 63° 27.769W | 28      |
| 15    | 13-Jan-06 | Field of Greens                  | 17° 30.620N | 63° 27.707W | 30      |
| 16    | 14-Jan-06 | Coral Garden                     | 17° 20.756N | 63° 15.036W | 23-30   |
| 17    | 14-Jan-06 | Conch Valley                     | 17° 21.184N | 63° 15.121W | 17-22   |

doi:10.1371/journal.pone.0010677.t002



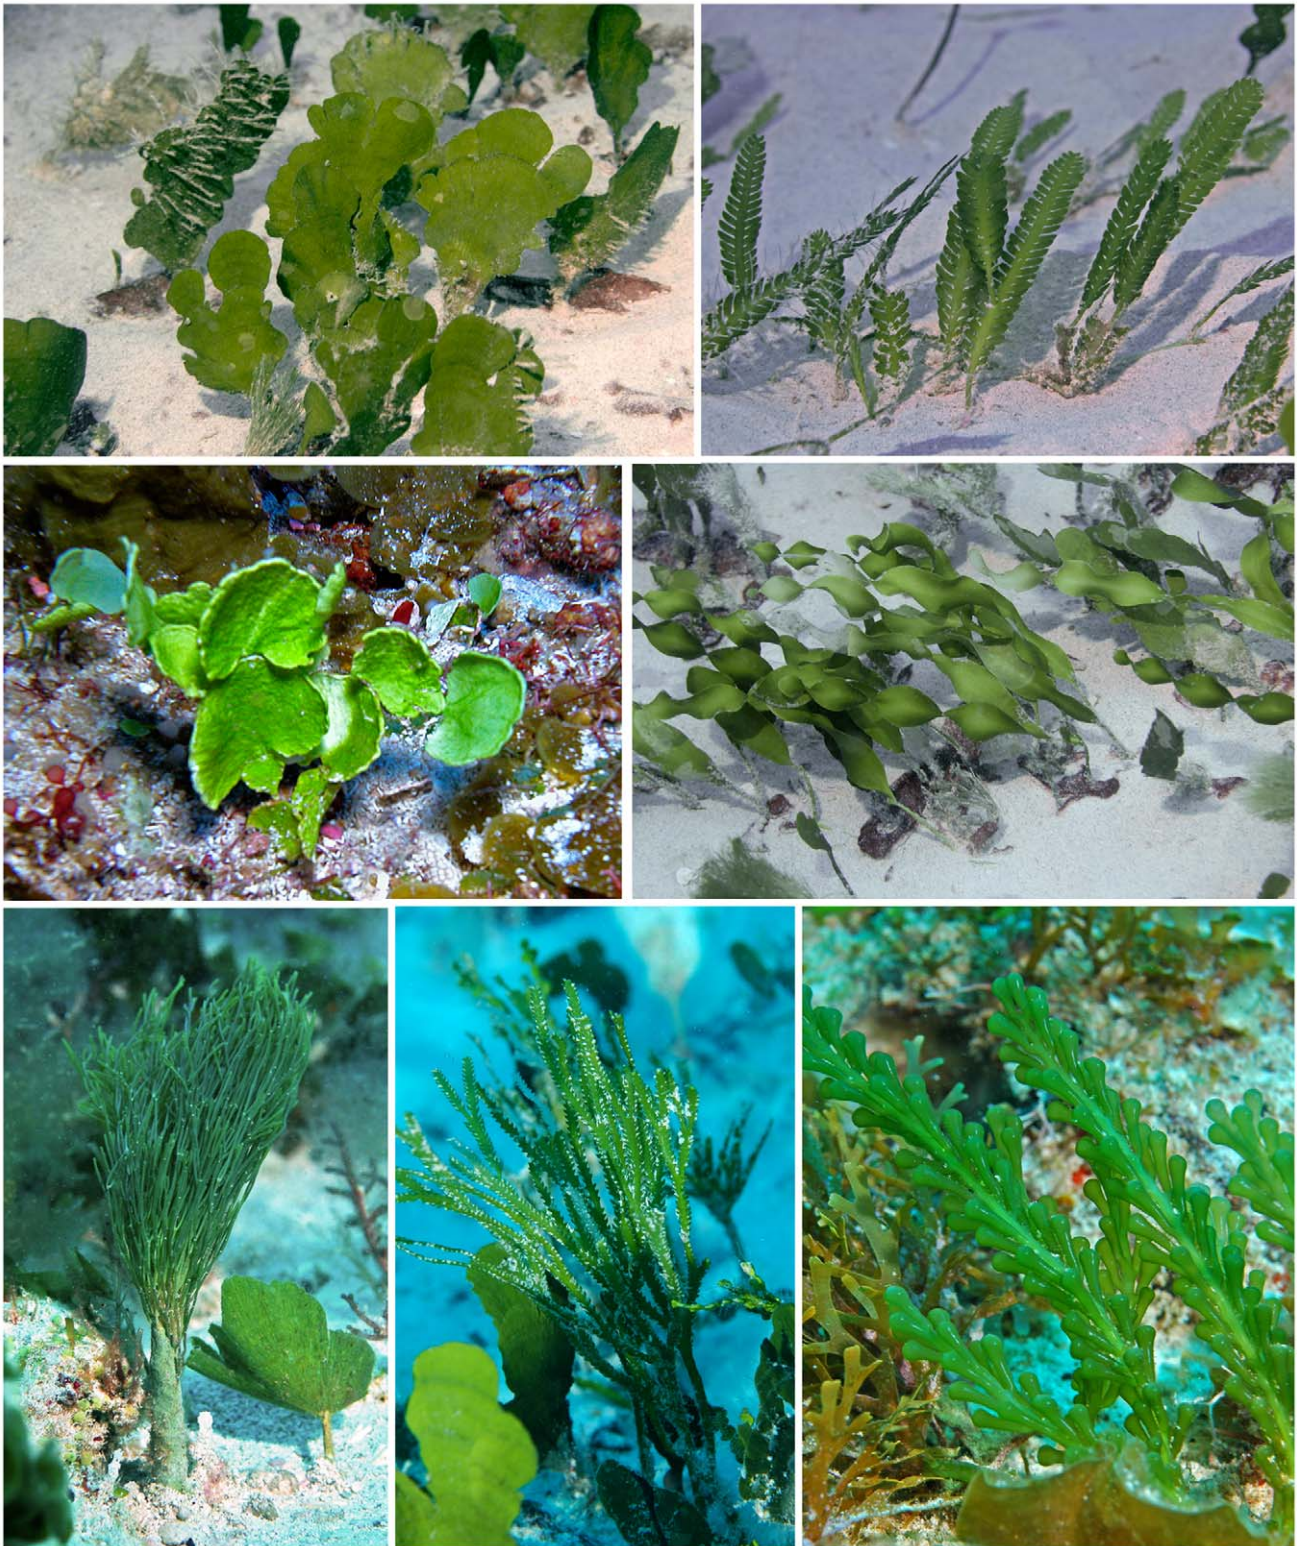

**Figure 3. Selected species from “Field of Greens”.** A region (> one hectare) of Saba Bank (depth 25 m) that our group named “Field of Greens” because the vast sand plain was dominated by green algae (Chlorophyta). Top left: *Udotea occidentalis*. Top right: *Caulerpa mexicana*. Middle left: *Halimeda* cf. *tuna* forma *platydisca*. Middle right: *Caulerpa prolifera*. Bottom left: *Penicillus dumentosus*. Bottom middle: *Caulerpa cupressoides*. Bottom right: *Caulerpa racemosa* f. *lamourouxii*. doi:10.1371/journal.pone.0010677.g003



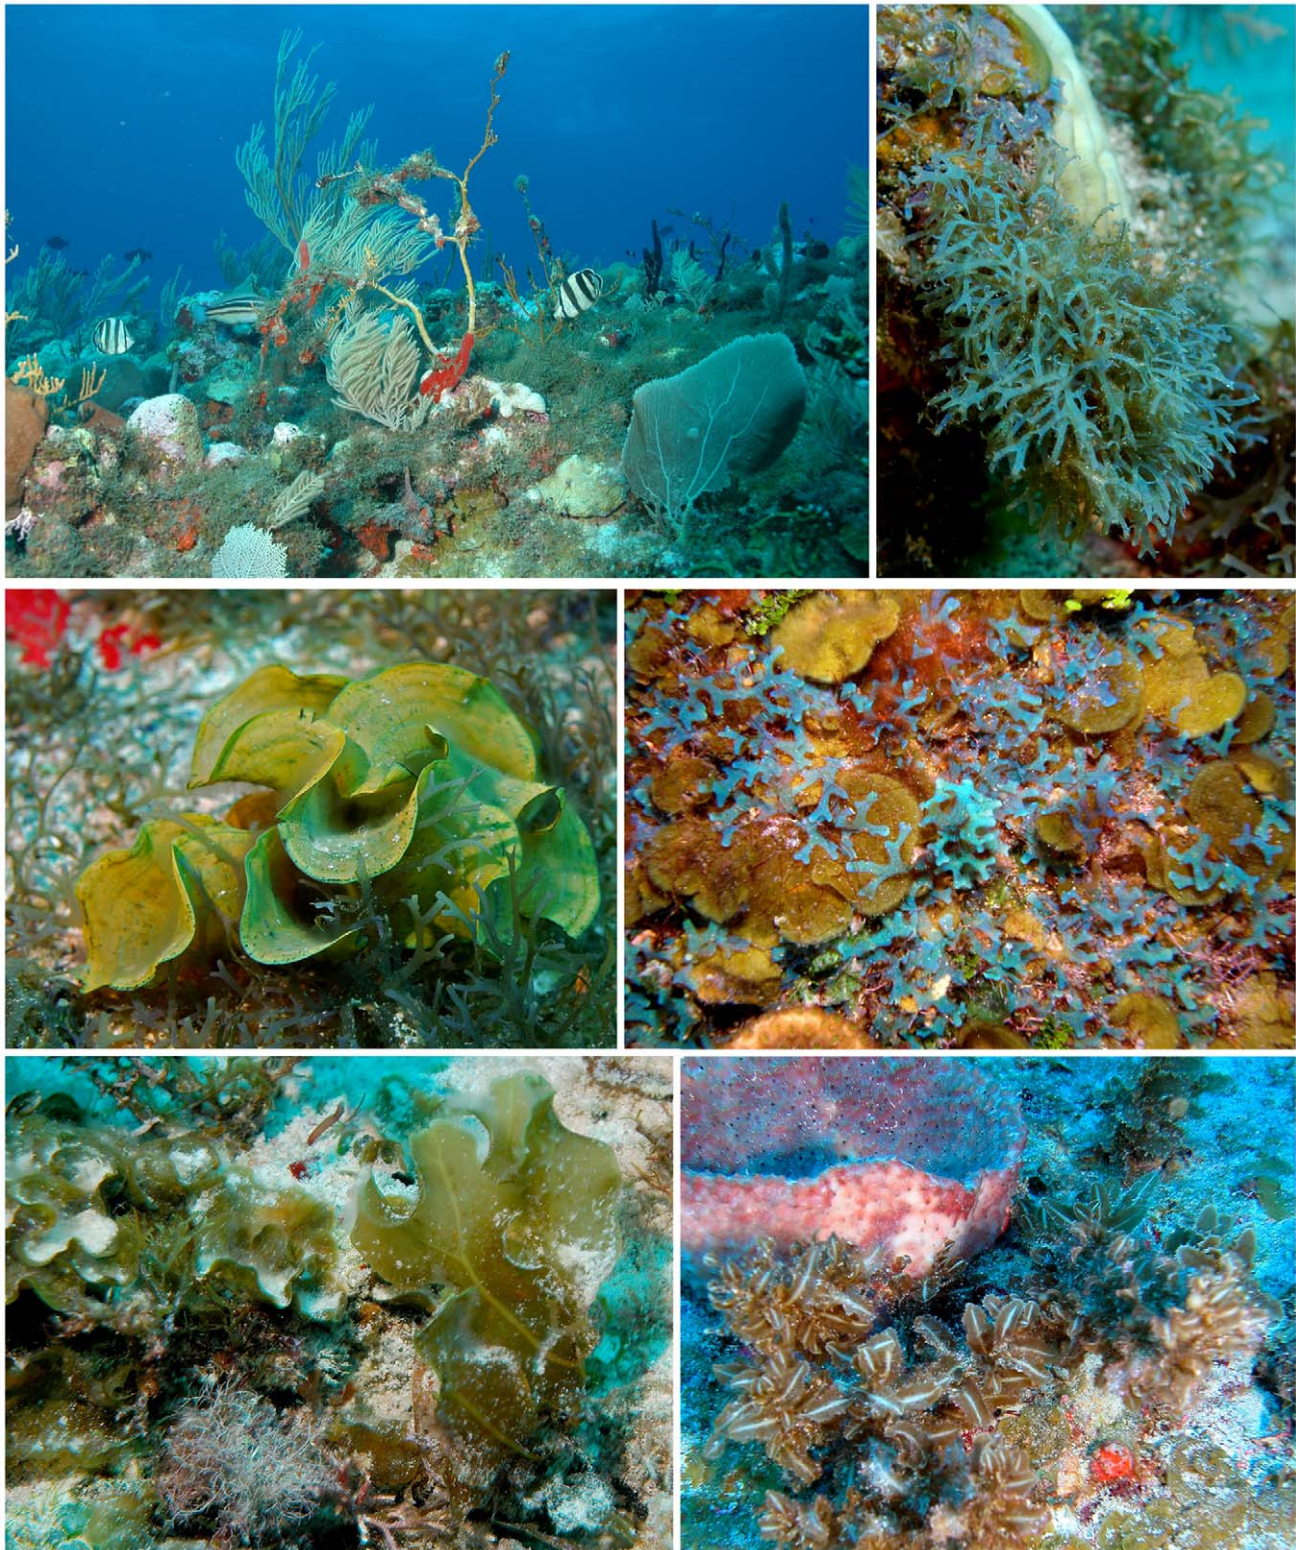

**Figure 4. Selected species from "Brown Town".** The large region (> one hectare) of Saba Bank (depth 25 m) nicknamed "Brown Town" because of the domination by brown macroalgae (Phaeophyceae). Top left: Overview of "Brown Town" habitat with over 50% cover of *Dictyota* turf. Top right: *Dictyota hamifera*. Middle left: *Stypopodium zonale*. Middle right: mixture of *Lobophora variegata* and *Dictyota humifusa*. Bottom left: *Dictyopteris justii*. Bottom right: *Sargassum hystrix*.  
doi:10.1371/journal.pone.0010677.g004



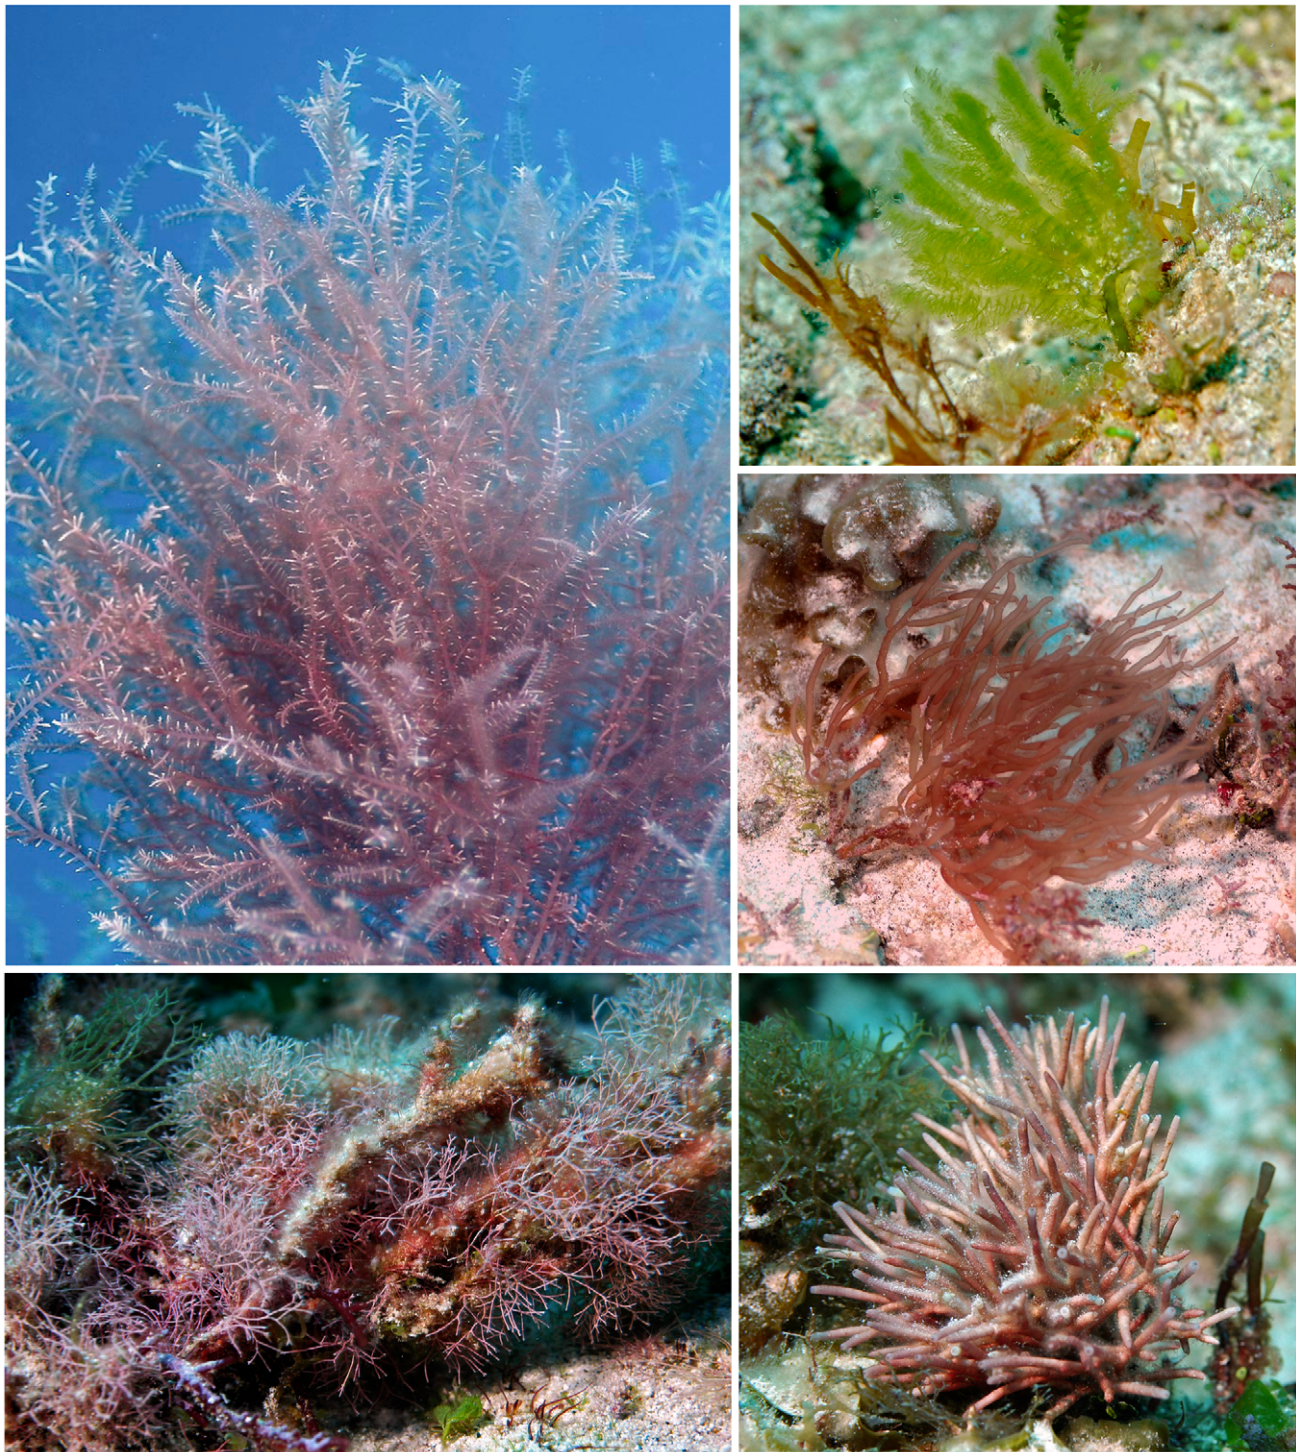

**Figure 5. Selected specimens from “Seaweed City”.** Specimens dominating the stony pavement area (30 m deep) termed “Seaweed City”, dominated by red algae (Rhodophyta). Top left: *Wrightiella blodgettii*. Top right: *Hypoglossum hypoglossoides*. Middle right: *Gracilaria cylindrica*. Bottom left: *Jania capillacea*. Bottom right: *Tricleocarpa fragilis*.  
doi:10.1371/journal.pone.0010677.g005

author, collector, collector number and precise location as a satellite map and longitude/latitude. Searching for a given parameter generates information associated with the specimens collected by the project under that parameter. Images taken of in situ living plants from the field are attached at the bottom of the label data.

## Discussion

Prior to this survey, the two most diverse areas for algae reported in the Caribbean had been Diamond Rock, Martinique [10] and Pelican Cays, Belize [12], a mangrove, seagrass, and coral complex. Habitats on Saba Bank have far exceeded both of



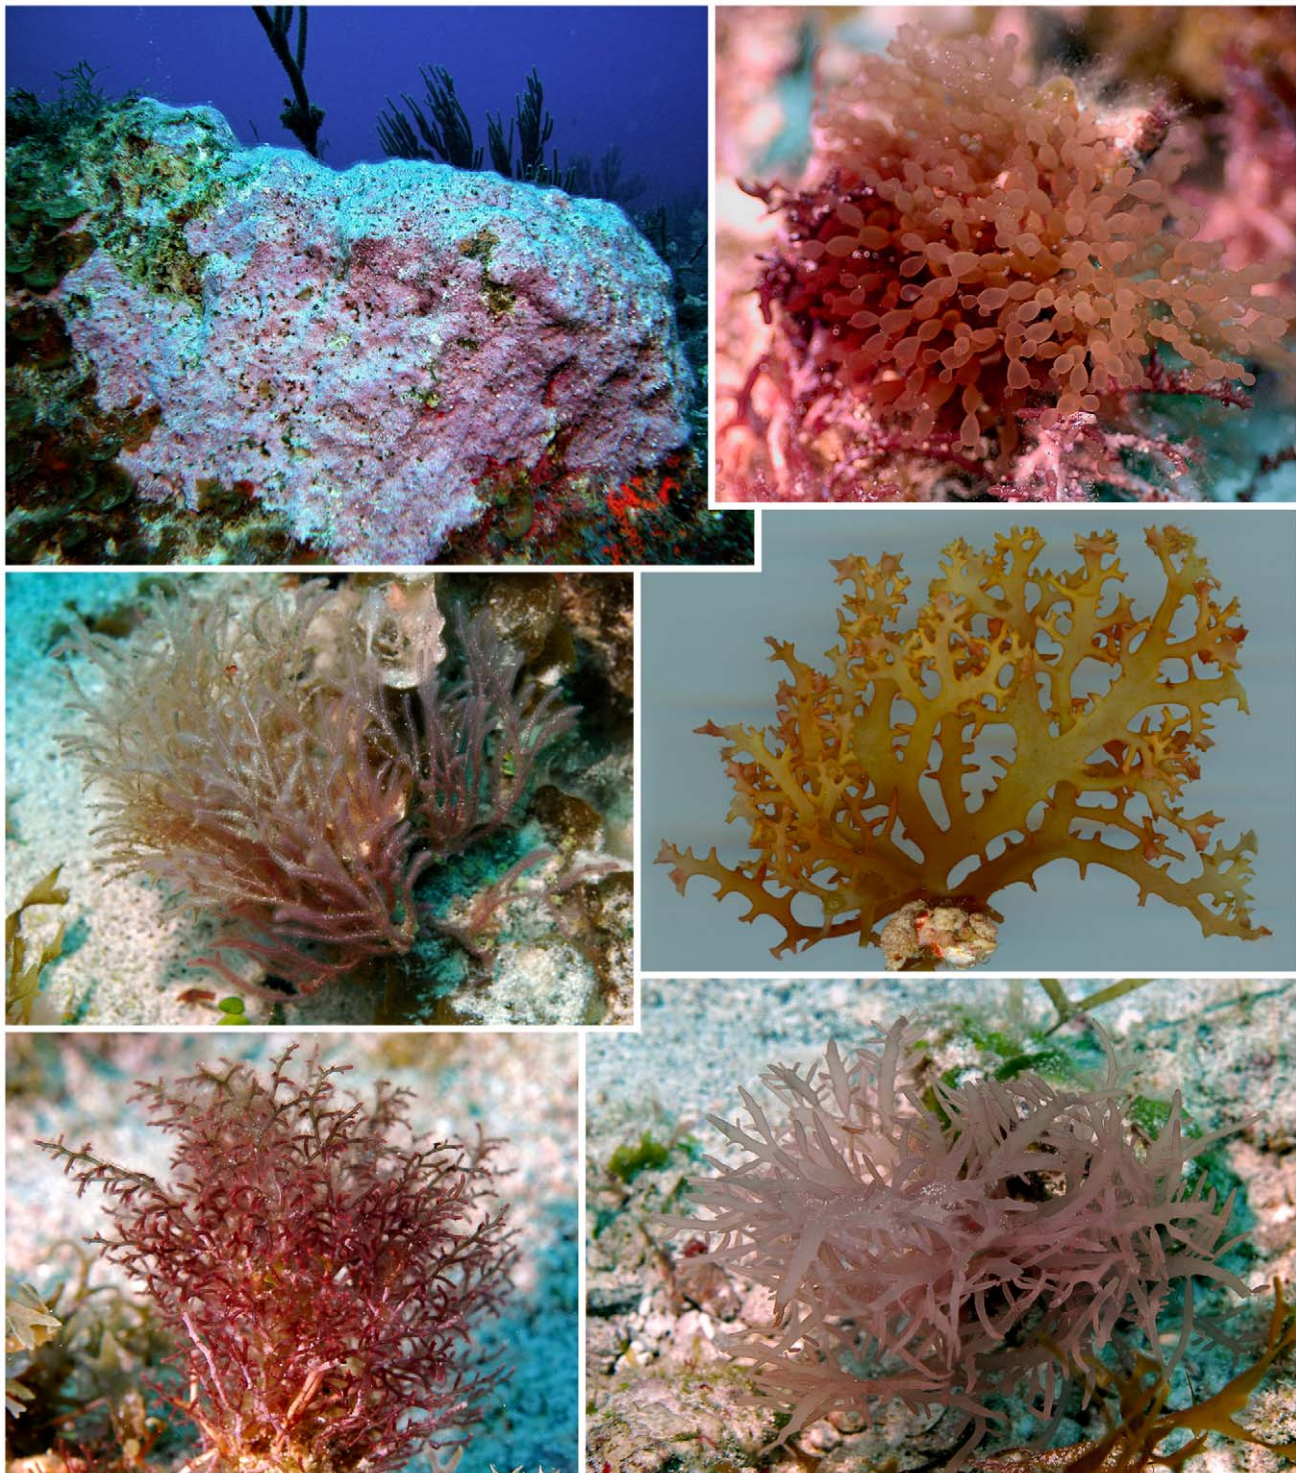

**Figure 6. Selected specimens from “Seaweed City”.** More Rhodophyta species characteristic of “Seaweed City” (Figure 5). Top left: *Porolithon pachydermum*. Top right: *Scinaia halliae*. Middle left: *Dasya antillarum*. Middle right: *Meristiella schramii*. Bottom left: *Laurencia intricate*. Bottom right: *Chrysomenia dickieana*.

doi:10.1371/journal.pone.0010677.g006

these places for species diversity per unit collection effort. A major reason for this uniqueness and richness is the sheer size and habitat range of the seamount/atoll.

The rim habitats range from windward pristine coral reefs to extensive leeward rhodolith (coralline algal spheres) beds (N

17°25.832', W 63°40. 962') containing a high diversity of small epiphytic algal taxa. The Relative Dominance Model [9] is useful for characterizing the health of any given coral reef. According to this model, healthy coral reefs are dominated by reef-building (hermatypic) corals, crustose coralline algae, and high populations



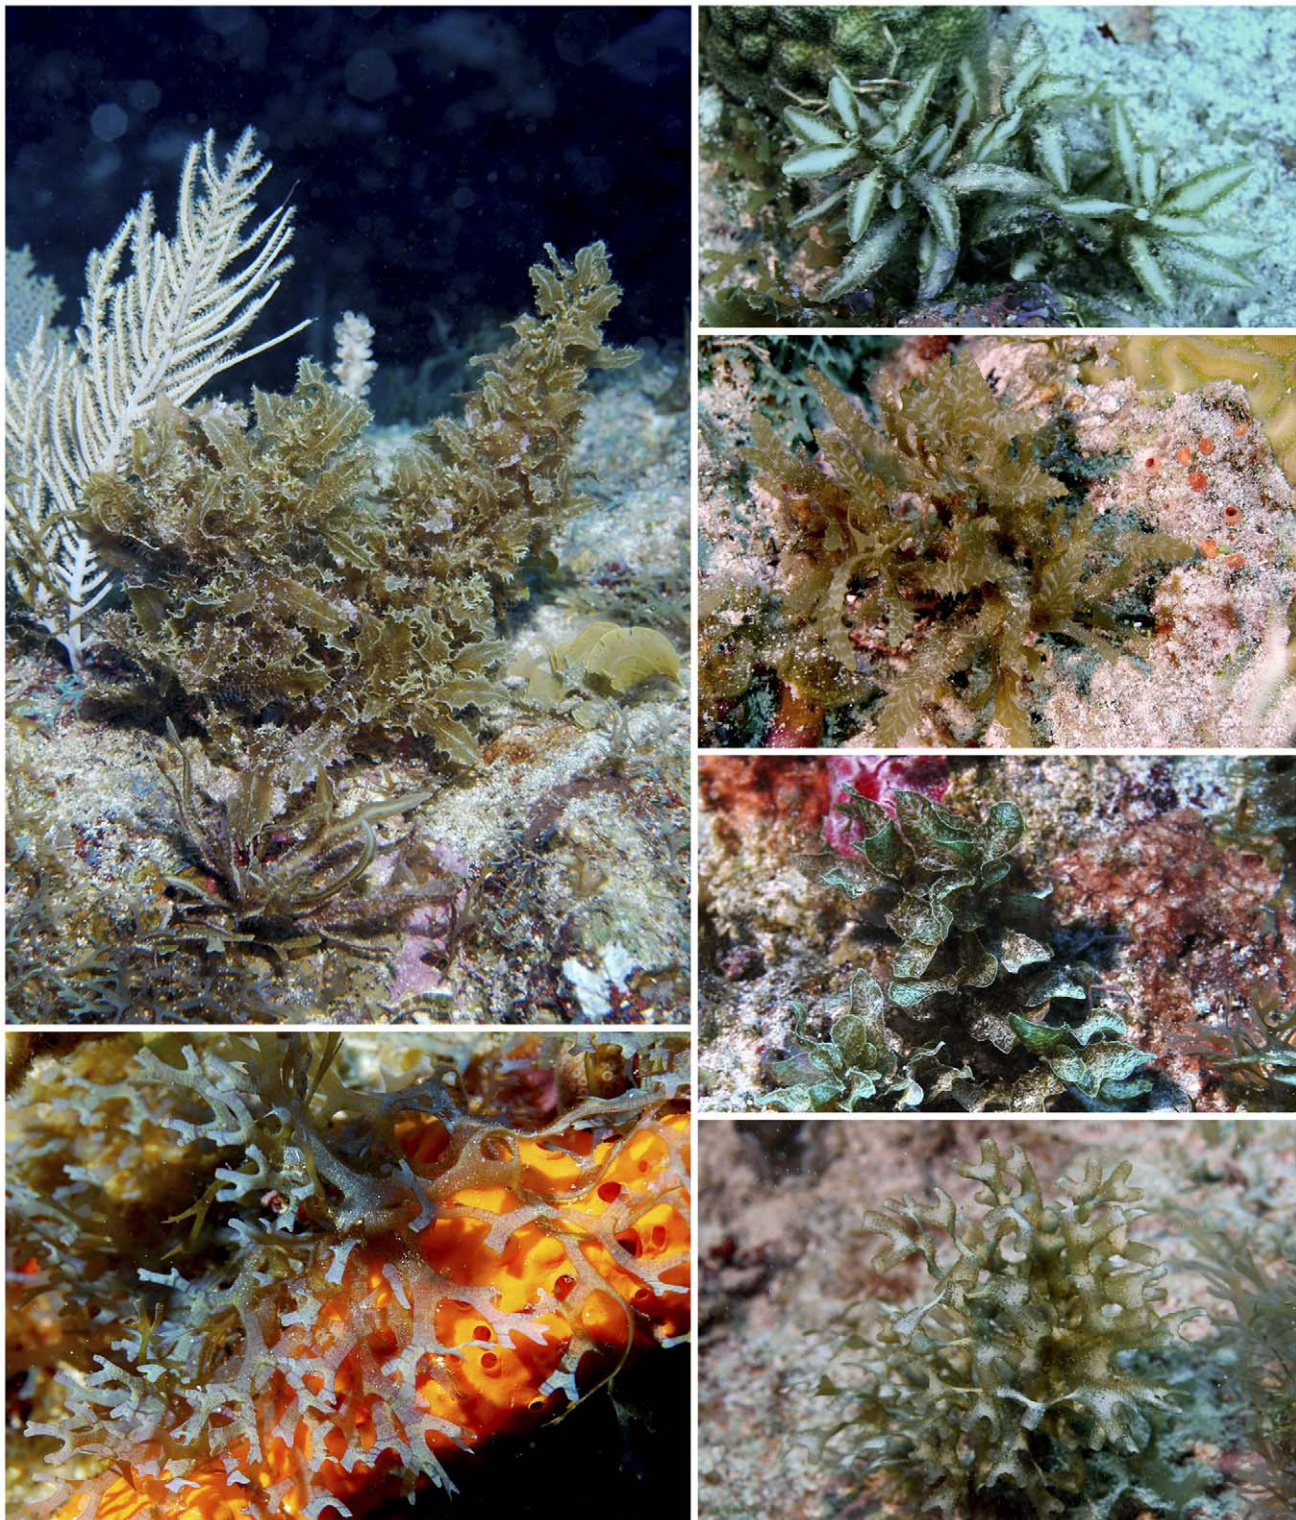

**Figure 7. Selected specimens from potential new species.** Some examples of potential new species of brown algae (Phaeophyceae) from Saba Bank (35–45 m deep). Top four: *Sargassum* spp. Bottom right and left: *Dictyota* spp.  
doi:10.1371/journal.pone.0010677.g007

of herbivorous fishes – all characteristic of Saba Bank’s windward eastern rim and fore-reef slope (Figure 8).

Vast sedimentary environments with some interspersed bedrock create relatively unstructured interior plains behind the rim commu-

nities, where seagrass beds would normally abound. However, seagrasses are absent (presumably due to excessive depths and insufficient light). Here vast plains of various groups of large and robust algal forms provide the three-dimensional structural heteroge-



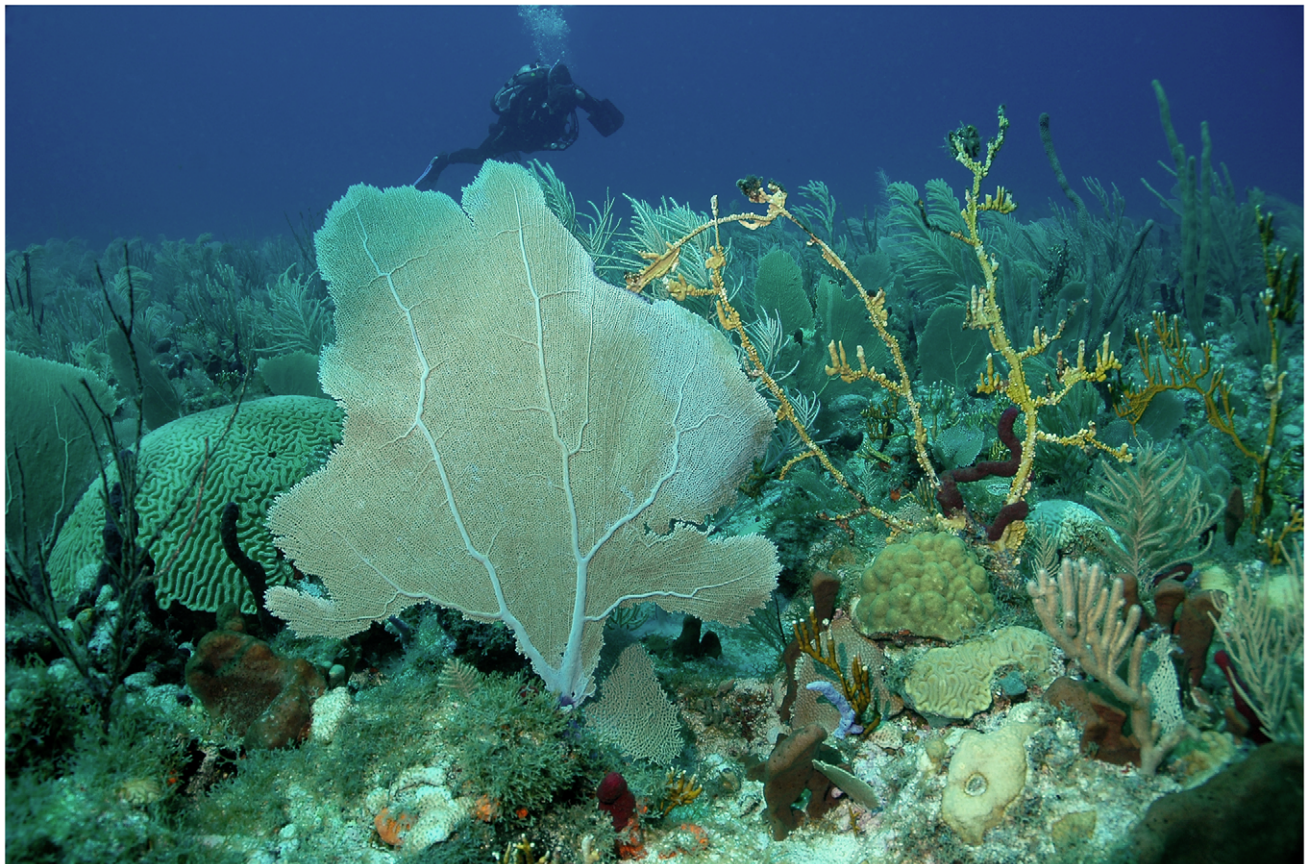

**Figure 8. Windward fore-reef slope.** Coral-dominated community characteristic of the windward (east) fore-reef slope of Saba Bank.  
doi:10.1371/journal.pone.0010677.g008

neity. These are many of the rhizophytic (i.e., rooted) Bryopsidales forms typical of healthy seagrass beds in the sedimentary habitats. The seagrass model [13] indicates that these sand plains of robust large epiphyte-free green algae, as in Field of Greens (Figure 3), indicate pristine oligotrophic conditions. The same can be said in the cases of Brown Town (Figure 4) and Seaweed City (Figures 5 and 6), where especially clean robust macroalgal forms predominate on hard bottom. Few filamentous and thin sheet forms indicative of stressed or physically disturbed environments were observed.

## Materials and Methods

During 2–16 January 2006, we accompanied a multi-disciplinary team of sixteen other scientists and managers of marine protected areas to conduct a detailed biological assessment and sampling program of Saba Bank. The survey focused on the comprehensive survey of fishes, mollusks, crustaceans, macroalgae, and sponges. The team was supported by three vessels, two marine park patrol boats and a fishing vessel that operated together. Dives were made primarily in representative areas of interest at depths from 12 to 50 m and included both biological sampling and photographic documentation. A photographic overview of this

expedition and the three dive sites with highest algal diversity is available online: <http://www.littlersworks.net/>.

Collections for pressing were taken by hand and preserved in the field and processed upon returning to the Smithsonian Institution. Nearly all specimens were photographed in situ and the same plants were placed in individual numbered plastic bags at the time of collection. These were transferred to polycarbonate scintillation vials, fixed in 5% formalin, finally preserved in 70% ethanol, and later examined microscopically. Additionally, identical specimens for molecular analyses were dried in frozen silica gel, placed in hermetically sealed vials, and stored in a freezer. All macroalgal/seaweed specimens were deposited in the Algal Collection of the US National Herbarium, Smithsonian Institution. All Saba Bank projects have collecting permits through CITES (where necessary) and the Saba Conservation Foundation (where CITES is not required).

## Author Contributions

Conceived and designed the experiments: MML DSL BLB. Performed the experiments: MML DSL BLB. Analyzed the data: BLB. Contributed reagents/materials/analysis tools: BLB. Wrote the paper: MML DSL.

## References

1. Meesters EH, Nijkamp H, Bijvoet L (1996) Towards sustainable management of the Saba Bank. A report for the Department of Public Health and Environment (VOMIL) Curaçao, Netherlands Antilles. KNAP Project 96-03: 42. Available: <http://www.mina.vomil.an/Pubs/MeestersKNAP96-03-Sababank.pdf> via the Internet. Accessed 28 Apr 2009.
2. Spencer JW (1904) The windward islands of the West Indies. Transactions of the Canadian Institute 7: 351–370. Available: <http://books.google.com/books?id=OM0VAAAAYAAJ> via the Internet. Accessed 28 Apr 2009.
3. Vaughan TW (1919) Fossil corals from Central America, Cuba, and Puerto Rico, with an account of the American Tertiary, Pleistocene, and recent coral reefs.

- Smithsonian Institution, United States National Museum, Bulletin 103: 189-524+I-XIV. Available: [http://books.google.com/books?id=\\_tgaAAAAYAAJ](http://books.google.com/books?id=_tgaAAAAYAAJ) via the Internet. Accessed 28 Apr 2009.
4. Davis WM (1926) The Lesser Antilles. American Geographic Society, Map of Hispanic America, Publication 2: 212.
  5. Van der Land J (1977) The Saba Bank, a large atoll in the northeastern Caribbean. *FAO Fisheries Reports* 200: 469–481. Available: [http://www.nacri.org/greylit/VanderLandJ\\_SabaBankAtoll1977.pdf](http://www.nacri.org/greylit/VanderLandJ_SabaBankAtoll1977.pdf) via the Internet. Accessed 28 Apr 2009.
  6. MacIntyre IG, Kinsman DJJ, German RC (1975) Geological reconnaissance survey of Saba Bank, Caribbean Sea. *Caribbean Journal of Science* 15: 11–20. Available: <http://academic.uprm.edu/publications/cjs/VOL15A/P011-020.PDF> via the Internet. Accessed 28 Apr 2009.
  7. Klomp KD, Kooistra DJ (2003) A post-hurricane, rapid assessment of reefs in the Windward Netherlands Antilles (stony corals, algae, and fishes). *Atoll Research Bulletin* 496: 404–437. Available: <http://hdl.handle.net/10088/4800> via the Internet. Accessed 28 Apr 2009.
  8. Colwell RK (2006) EstimateS: Statistical estimation of species richness and shared species from samples. Version 8.0, November 12, 2006. User's Guide and application. Available: <http://purl.oclc.org/estimates> via the Internet. Accessed 28 Apr 2009.
  9. Littler MM, Littler DS (2007) Assessment of coral reefs using herbivory/nutrient assays and indicator groups of benthic primary producers: a critical synthesis, proposed protocols, and critique of management strategies. *Aquatic Conservation: Marine and Freshwater Ecosystems* 17: 195–215. Available: <http://hdl.handle.net/10088/2619> via the Internet. Accessed 28 Apr 2009.
  10. Littler MM, Littler DS, Lapointe BE (1993) Modification of tropical reef community structure due to cultural eutrophication: the southwest coast of Martinique. *Proceedings of the 7th International Coral Reefs Symposium, Guam, 1992* 1: 335–343. Available: <http://hdl.handle.net/10088/2570> via the Internet. Accessed 28 Apr 2009.
  11. Littler DS, Littler MM, Brooks BL (2007) Marine Algae of Saba Bank. In: Mori SA, Buck WR, Gracie C, eds. *Plants and Lichens of Saba, Virtual Herbarium*. Available: <http://sweetgum.nybg.org/saba/algae.html> via the Internet. Accessed 28 Apr 2009.
  12. Littler MM, Littler DS (1997) An illustrated marine flora of the Pelican Clays, Belize. *Bulletin of the Biological Society of Washington* 9: 149.
  13. Littler MM, Littler DS (2005) Application of a seagrass management model. In: Krupnick GA, Kress WJ, eds. *Plant conservation: a natural history approach*. Chicago & London: University of Chicago Press. pp. 270-285. Available: <http://hdl.handle.net/10088/2611> via the Internet. Accessed 28 Apr 2009.
